# Supplementary material
Source: PubMed Central journal article supplement (PMC2940475)
Supplement: me.2009-0411_1.pdf [file me.2009-0411_1.pdf]

# Calculations for Putative GR-beta Arising from Exon 8 or Intron 8

## A

No splice site predictions for Exon 8

Donor site predictions of mGRbeta in intron 8.

| Start | End | Score | Exon     | Intron  |
|-------|-----|-------|----------|---------|
| 38    | 52  | 0.71  | agaaaaag | taggttg |
| 85    | 99  | 0.77  | cacagagg | tagagca |
| 154   | 168 | 0.84  | gagatacg | taagaga |
| 246   | 260 | 0.60  | aattagtg | atgtgt  |
| 905   | 919 | 0.97  | tgggaggg | taagcca |

Acceptor site predictions of mGRbeta in intron 8.

| Start | End | Score | Intron                                     | Exon |
|-------|-----|-------|--------------------------------------------|------|
| 844   | 884 | 0.84  | tattttattatcacctccttagaagcacaatctttttaataa |      |

## B

Primer 1: 3'TAAAGGCATCTGCCACCACC 5'

Primer 2: 3'CTGTCTTTGGGCTTTTGAGATAGG 5'

Primer 3: 3'CTTTGGGCTTTTGAGATAGGATC 5'

## C

Intron 8

gtaagtaccaaacataaataccaaaacaacagcaaaaa  
agaaaaagtaggttgggggtgggtggcagatgccttta  
tcacagcagacacagaggttagagcaagtagatgtcta  
tgagtctgaggctgctctacataggggaatgccaggac  
agtcagagatacgttaagagatcctatctcaaaagccc  
aaagacagagacagagagagacagagacagaagaaca  
ttgtaggctcctaggttatggtttaattagtgtatgtg  
tatagtttata**taccaat**cagtcattatagtgattatt  
caagataaataatTTTTTtacacatttctcttaagtct  
tactagtctgggtcatttgcgtaaagatgactctgtta  
gtacagagattcagtagctcctgattttaagtatccct  
gaagtacatgaaatgagctatcagattacactagtttc  
acctccctgtgtatcagtactgggtgcagtctcctttg  
agcctgctgcctcgtctcctgactgctgggatcacag  
gcatgccaggcttcattctgcacacagtttaagatgc  
cttttgttcttatgtgcttattttatttaaattattt  
tcttatctgaggaa**ttccaac**aaagattgggtatattt  
gtgatcaaattgtttaaaatggccagtagggcaggaa  
gcaggatctataaccaggctctctgtgtgtatatta  
cgactttcagtttagtggtctctgggattctggagtgt  
gggaaccagtaggtccctgactcttggttctctgttctt  
ggg**ttctcctttttctcttttgccttttcca**acaatat  
gatggtttttattttattttgctatgttttattttat  
tatcacctcttagaagcacaatctttttaataagagg  
agaagttgagaggaactgggagggtaagccacaatca  
agatacattacatgagaaaagaattttttcagtaa  
acaaaaaaatagtcaagacttgggtgtggggagccga  
gagatatgagccattcgcagttatgctttgaagcctc  
accattaccgtaatcttctcttgag

Red = branch point sequences

Blue = polypyrimidine tract
