# Supplementary material
Source: PubMed Central journal article supplement (PMC2940475)
Supplement: me.2009-0411_2.pdf [file me.2009-0411_2.pdf]

Calculations for Putative GR-beta Arising from Exon 9

**A**

**Donor site predictions for mGR beta in Exon 9**

| Start | End  | Score       | Exon                   | Intron              |
|-------|------|-------------|------------------------|---------------------|
| 1187  | 1201 | 0.62        |                        | agaccaagtaacttc     |
| 1890  | 1904 | <b>0.82</b> | <b>AAAACAGGTTTGCTC</b> | <b>32bp product</b> |
| 2189  | 2203 | 0.58        |                        | gcaatatgtaaatac     |
| 2262  | 2276 | 0.70        |                        | tttccaagtaagatg     |

**Acceptor site predictions for mGR beta in Exon 9**

| Start | End  | Score       | Intron                                           | Exon                 |
|-------|------|-------------|--------------------------------------------------|----------------------|
| 213   | 253  | 0.72        | acttatcaacttgtcttgtgatggtttgtcgcttctttttg        |                      |
| 328   | 368  | 0.41        | gccatcacttttcagtgacaggaaagcagacagtgatgtgc        |                      |
| 470   | 510  | 0.60        | aactttctgctcaactttcagttggctggataacactttct        |                      |
| 525   | 565  | 0.71        | gtgtatcccccatgtatagtttaggatagcattttgattt         |                      |
| 610   | 650  | 0.52        | gggaagtgtgaccttttatagctattactgtctggttttaa        |                      |
| 694   | 734  | 0.58        | taaataatgttattctagttattgtatagctgtttaaag          |                      |
| 705   | 745  | 0.47        | tgtattctagttattgtatagctgtttaaagatgggcagctg       |                      |
| 1041  | 1081 | 0.56        | cccaatgcaccatctcttcagtggtgctgtagcaacaaagt        |                      |
| 1081  | 1121 | 0.78        | tttgaactcagctctttcaggaccttcgggagtagttgt          |                      |
| 1128  | 1168 | 0.82        | ttttaaagtattattccagataaccagctgtgataaagc          |                      |
| 1321  | 1361 | 0.69        | tactgatttttgttatttgaactgaatgtcaggcatcca          |                      |
| 1615  | 1655 | <b>0.87</b> | <b>CTAATATATTTTTATATTTAGTTCTAGTTTCAGATATATAT</b> | <b>295bp product</b> |
| 1786  | 1826 | <b>0.96</b> | <b>CATGTTATATATTTTTTGTAGGGGTCAAAGAAATGTTGATG</b> | <b>124bp product</b> |
| 1929  | 1969 | 0.45        | ctggccctgtgtgcagtgacaggtcctgagggtttgaccgca       |                      |
| 2307  | 2347 | 0.66        | tttgaatgttatttttcagttattttgcagaaattattta         |                      |
| 2317  | 2357 | 0.56        | gttattttcagttattttgcagaaattatttaaaaaaaaa         |                      |

**B**

**Primer 4: 3' CTAGGGAGAGGGAGCTGGGA 5'**

**Primer 5: 3' CTCTAAGCTAGGGAGAGGGA 5'**

**C**

Predicted PCR product sizes of GR beta from Intron 8 or Exon 9

Exon 7+8 = 289bp

**GRbeta Intron 8:**

Primer1 GR beta1-R: 73+289 = **362bp product**

Primer2 GR beta2-R: 187+289 = **476bp product**

Primer3 GR beta3-R: 189+289 = **478bp product**

**GRbeta Exon 9 (Primer4):**

GT Donor (highest score): 289+32 = **321bp product**

AG Acceptor 1 (highest score): 289+124 = **413bp product**

AG Acceptor 2 (2<sup>nd</sup> highest score): 289+295 = **584bp product**

**D**

Green = mGRalpha mRNA Exon 9 sequence

Blue = Highest scores for splice-site predictions

**mGR Exon 9**

GTGGTTGAAAATCTCCTTAGCTACTGCTTCCAAACATTTTTGGATAAGTCCATG  
 AGTATTGAATTCAGAGATGTTAGCTGAAATCATCACTAATCAGATAACAAAA  
 TACTCAAATGGAATATCAAAAAGCTTCTGTTTCATCAGAAATGACTGCCTTAC  
 TAAGAAAGGCTGCCTTAAAGAAAGTTGAATTTATAGCTTTTACTGTACAAAAT  
 ATCAACTTGTCTTGTAGATGTTTTGTCGTTCTTTTTGTTTGTCTTGTGTTTT  
 CTATACGCACTACATGTGGTCTCTAGAGGGCCAAGACTTGGCAACAGAAGCAGA  
 TGAGCCATCACTTTTCAGTGACAGGAAAGCAGACAGTGATGTGCATTGGCTGGT  
 GTATCACAGAACTAGAACAGTTAGTGGAGACATGTCCACTATCAGAGAAGGAC  
 CGCACCTGAACCACCAGTGCCCAAAGTCCATGTGATCAACTTTCTGCTCAACTT  
 TCAGTTGGCTGGATAACACTTTCTAGACTTTTCTGTTGGTGTATTTTTCCCATG  
 TATAGTTAGGATAGCATTTTTGATTTATGCATGGAAACCTGAAAAAAGTTTACAC  
 GTGTATATCAGAAAAGGGAAGTTGTGCCTTTTATAGCTATTACTGTCTGGTTTT  
 AACAAATTCCTTTATATTCAGTGAACATGCTTGTCTCGTTTTCTTAAATAATT  
 TTTGTATTCAGTTATTGTATAGCTGTTTAAAGTGGGCAGCTGCCTCACAGCTC  
 TCCTAGACGCTAACATTAATTTCCGTGTGAAAATGGGTCCGTGCTCCTACCCTG  
 ATGGCACTCAGCTATCAGAAGACCACAGAAATGACTCAGATCTCCAGTATTCT  
 TGTCAAAGCTCTTACTCTGTATATATCTGCTTCCATGGGGAATTATATAGGTT  
 GTGCAGATTAACCGTCTTAAGTGGTATAGAGCACCTAGTCCAGTGACCTGCTGG  
 GTAAACTGTGGATGATGGTTACAAAAGACTAATTGTAACAGTGCACCACCAAC  
 AGGCCCGTTTTGCACCAATGCACCATCTCTTCAGTGGTGCATAGCAACAAAG  
 TTTGTAACCTCAGCTCTTTCAGGACCTTCGGGAGTAGTTTGTGTAACATTTTAA  
 ATGTATTATTCAGATAACCAGCTGTGATAAAGCCGAGAGATTGTTTTAATCAG  
 ACCAAGTAACTCTCTCATTAACGTTACCCTCAACTAAGTCTCTAATATGGCA  
 AGAATGGCTAGACACCACTTTTACATCCCACCTGTCCACCAATTTGGTCTAGCTT  
 TCCTGGTGGTACAGAAAATCAGCTACTGATTTTTTGTATTATTAGAACTGAATG  
 TCAGGCATCCATGTTTGTCCAACATACATCCCTACATGTGCCATAGAATCTAA  
 CACAAGTCTTGTGAACTTCTTACACTGAGAGTTATCATTTTTAAACAAAACAGA  
 AGCTGTAGTAGCCCTTTCTGTGTGCACCTTACCAACTTTCTGTGACTCAAAGCT  
 TAACACACTTACTAAGCCACAAGAAATCTGATTTCTACTTAAAGGTGGCCAAATT  
 ATTTGTGTAATAGAAAATGAAAATCTAATATTAATAAATATGAAACTTCTAATA  
 TATTTTTATATTTAGTTCTAGTTTCAGATATATATCATATTGGTATTCACATA  
 CTGGGAAGGGAAGGGCTACTGCAGCTGTACATGCAATTTATTAACATGATTGTA  
 AAATAGCTGTATAGTGTAAAATAAGAATGATTTTTAGATGAGATTGTTTTATCA  
 TGACATGTTATATATTTTTTGTAGGGGTCAAAGAAATGTTGATGGATATCCTAT  
 AAGATTTATAGTATATAAGAGCATCCATACAGGCCTCAGTGGTCTGGAAATTA  
 AAACAGGTTTGTCTTAAGCTAGGGAGAGGGGACTGGCCCTGTGTGCAG  
 TGCAGGTCCTGAGGGTTTTGACCCGATCAGATCACAGGGGAACATAATCCCTCCC  
 ATCTAACCATCCTCATCCGACCATGGCCCTGTGAGTGCAGGCTGGCTTTATTAA  
 ATCCAGGACAGAAAGGTGGCGCTTATGTACTTAGAGGCACCGTCCAGTAACAGG  
 GTTGTTCACATGCAGCCTCCGCACGGGTTAACAGAAACAGAGGCTTTAGAAG  
 TTTGGCAATAATGTGCATAGAGGTTCCAGCAATATGTAATACTAAAGAATCGC  
 ATAGGAAGCCAATAATACACTAATCCTCTCCATCCTACAAGAGTCCATTTCCAA  
 GTAAGATGAGGACATGTTTATGTTTTCTTTGAATGCTTTTTGAATGTTGTTATT  
 TTCAGTATTTTGCAGAAATTAATTAATAAAAAAAGTATAATCATTGCTTTTT  
 GAATTTCTCTTAAAGGGAATGTTGAGTTTGTAAATGTTTAAATTTGGTCTCAAA  
 GACTTTTAAATAATTGTAACCCAGCTGGATGTGAAATTTATGGTGCCTAAGAA  
 ATACCACCTGAAGATTATCAATGACAGTGTAAAGTTTCAAATGAGCTTCTCAA  
 AAATAGATTATTGTACATTTATGGAATGTTATATGGTTAAACCCAAAAAGCACA  
 TCACACATAAATCTGCTTTTTCAGTTCCAACCAGCTTGGCTTTCAAATAAGAGCT  
 CC
