# Supplementary material
Source: PubMed Central journal article supplement (PMC2940475)
Supplement: me.2009-0411_3.pdf [file me.2009-0411_3.pdf]

## Mouse GRbeta mRNA sequence

```
1 atggactcca aagaatcctt agctccccct ggtagagacg aagtccccag cagtttgctt
61 ggccggggga ggggaagcgt gatggacttg tataaaacc tgaggggtgg agctacagtc
121 aaggtttctg cgtcttcacc ctcaagtggc gctgcttctc aggcagattc caagcagcag
181 aggattctcc ttgatttttc aaaaggctca gcaagcaatg cacagcagca gcagcagcag
241 cagcagccgc agccagattt atccaaagcc gtttcactgt ccatgggact gtatatggga
301 gagaccgaaa caaaagtgat ggggaatgac ttgggctacc cacagcaggg ccagcttggc
361 ctctcctctg gggaaacaga ctttcggctt ctggaagaaa gcattgcaaa cctcaatagg
421 tgcaccagcc gtccagagaa tcccaagagt tcaacacctg cagctgggtg tgctaccccg
481 acagagaagg agtttcccca gactcactct gatccatctt cagaacagca aaatagaaaa
541 agccagcctg gcaccaacgg tggcagtgtg aaattgtata ccacagacca aagcaccttt
601 gacatcttgc aggatttggg gttttctgcc ggggtccccag gtaaagagac aaacgagagt
661 ccttggaggt cagacctgtt gatagatgaa aacttgcttt ctcttttggc gggagaagat
721 gatccattcc ttctggaagg ggacgtgaat gaggattgca agcctcttat ttaccggac
781 actaaaccta aaattcagga tactggagat acaatcttat caagccccag cagtgtggca
841 ctgccccaa g tgaaaacaga gaaagatgat ttcattgagc tttgcacccc tggggtaatt
901 aagcaagaga aactgggccc ggtttattgc caggcaagct tttctgggac aaatataatt
961 gggataaaaa tgtctgccat ttctgttcat ggcgtgagta cctctggagg acagatgtac
1021 cactatgaca tgaatacagc atccccttct cagcagcagc atcagaagcc tgtttttaat
1081 gtcattccac caattcctgt tggttctgaa aactggaata ggtgccaagg gtctggagag
1141 gacaacctga cttccttggg ggctatgaac ttcgcaggcc gctcagtgtt ttctaataga
1201 tattcaagcc ctggaatgag accagatgtg agttctctc cgtccagctc ctccacagca
1261 acgggaccac ctcccaaact ctgcctgggtg tgctccgatg aagcttcggg atgccattat
1321 ggggtgctga cgtgtggaag ctgtaaagtc ttctttaaaa gagcagtgga aggacagcac
1381 aattacctt gtgctggaag aaatgattgc atcattgata aaattcgaag aaaaaactgt
1441 ccagcatgcc gctatcgaaa atgtcttcaa gctggaatga acctggaagc tcgaaaaacg
1501 aagaaaaaaaa ttaaaggaat tcagcaagcc actgcaggag tctcacaaga cacttctgaa
1561 aacgctaaca aaacaatagt tctgcccgg ctgccacagc ttacccttac cctgggtgtca
1621 ctgctggagg tgatcgagcc tgagggtgta tatgcaggat atgacagctc tgttccagac
1681 tcagcatgga gaattatgac cacgctcaac atgttagggtg ggcgccaagt gattgcccga
1741 gtgaaatggg caaaggcgat accaggattc agaaacttac acctggatga ccaaatgacc
1801 cttctacagt actcatggat gtttctcatg gcatttgcc tgggttggag atcatacaga
1861 caagcaagtg gaaacctgct atgctttgct cctgatctga ttattaatga gcagagaatg
1921 actctaccct gcatgtatga ccaatgtaaa cacatgctgt ttatctccac tgaattacaa
1981 agattgcagg tctctatga agagtatctc tgtatgaaaa ccttactgct tctctcctca
2041 gttcctaagg aaggtctgaa gagccaagag ttatttgatg agattcgaat gacttatatc
2101 aaagagctag gaaaagccat tgtcaaaagg gaaggaaact ccagtcagaa ttggcagcgg
2161 ttttatcaac tgacaaaact tttggactcc atgcatgatg taagtaccaa acataaatcc
2221 aaaacaacag caaaaaagaa aaagtag
```
